# Supplementary material for: Development of energy plants from hybrids between Miscanthus sacchariflorus and M. lutarioriparius grown on reclaimed mine land in the Loess Plateau of China
Source: PubMed Central journal article supplement (PMC9885154; doi:10.3389/fpls.2022.1017712), 2023-01-16
Supplement: DataSheet_1.pdf [file DataSheet_1.pdf]

## Supplementary Material

### Supplementary Figures and Tables

#### Supplementary Figures

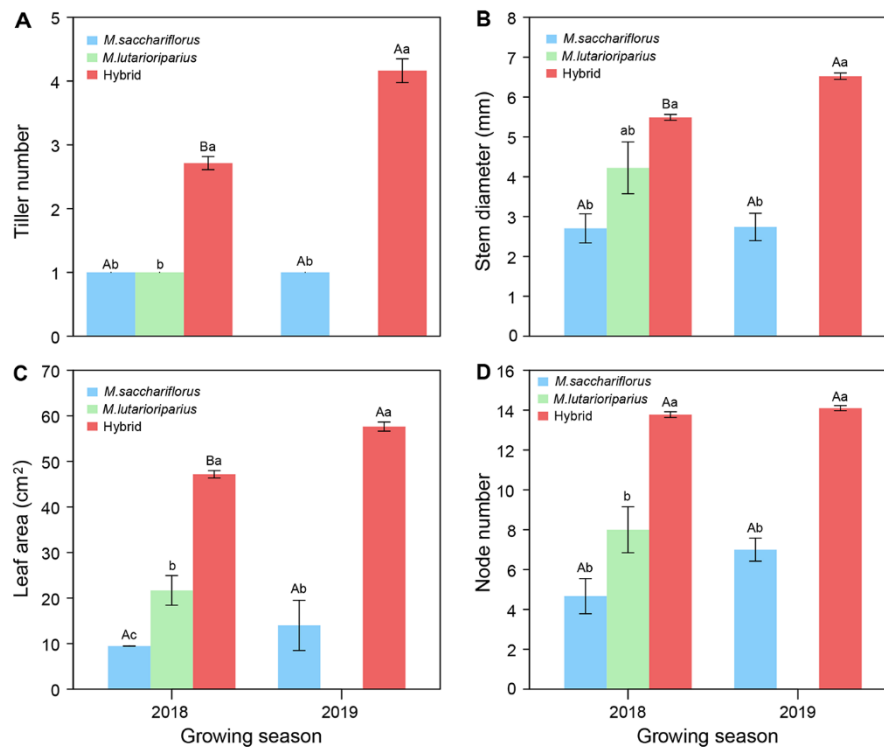

**Supplementary Figure 1.** Differences of (A) average tiller number, (B) stem diameter, (C) leaf area and (D) node number between measuring hybrid and parent individuals in two consecutive growth seasons. Different capital letters represent a significant difference between two years at  $P < 0.05$  level, and different lowercases represent a significant difference between three *Miscanthus* at  $P < 0.05$  level. Error bars indicate standard error of 333 surviving hybrid individuals, 5 and 3 surviving female parent individuals in 2018 and 2019, and 10 surviving male parent individuals in 2018, respectively.

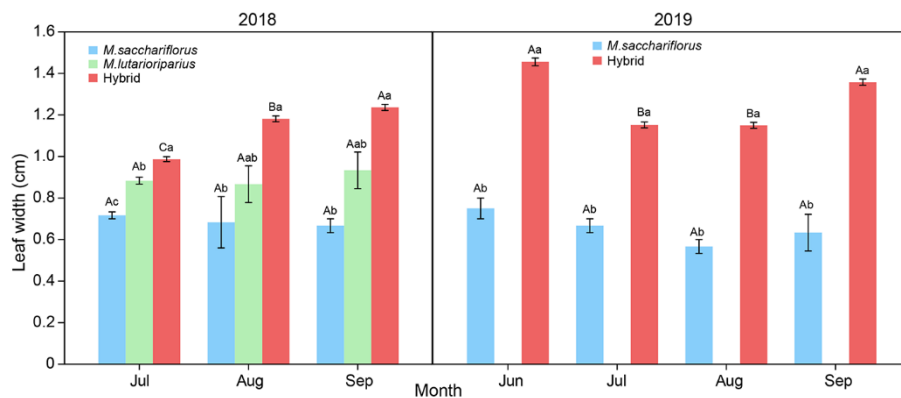

**Supplementary Figure 2.** Differences of average leaf width between measuring hybrid and parent individuals throughout growth months in two growing seasons. Different capital letters represent a significant difference in leaf width between growth months at  $P < 0.05$  level and different lowercases represent a significant difference of three *Miscanthus* at  $P < 0.05$  level. Error bars indicate standard error of 333 surviving hybrid individuals, 5 and 3 surviving female parent individuals in 2018 and 2019, and 10 surviving male parent individuals in 2018, respectively.

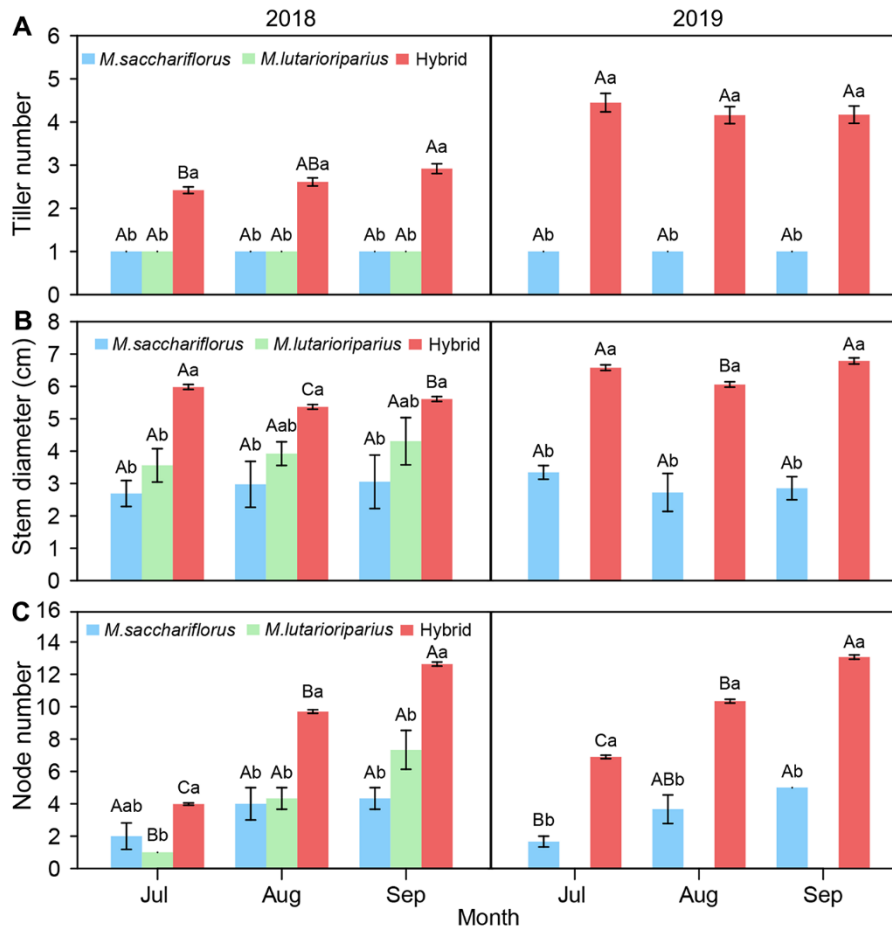

**Supplementary Figure 3.** Differences of (A) average tiller number, (B) stem diameter and (C) node number between measuring hybrid and parent individuals in the 2018 and 2019 growing season. Different capital letters represent a significant difference between growth months at  $P < 0.05$  level, and different lowercases represent a significant difference in tiller number, stem diameter and pitch number between three *Miscanthus* at  $P < 0.05$  level. Error bars indicate standard error of 333 surviving hybrid individuals, 5 and 3 surviving female parent individuals in 2018 and 2019, and 10 surviving male parent individuals in 2018, respectively.

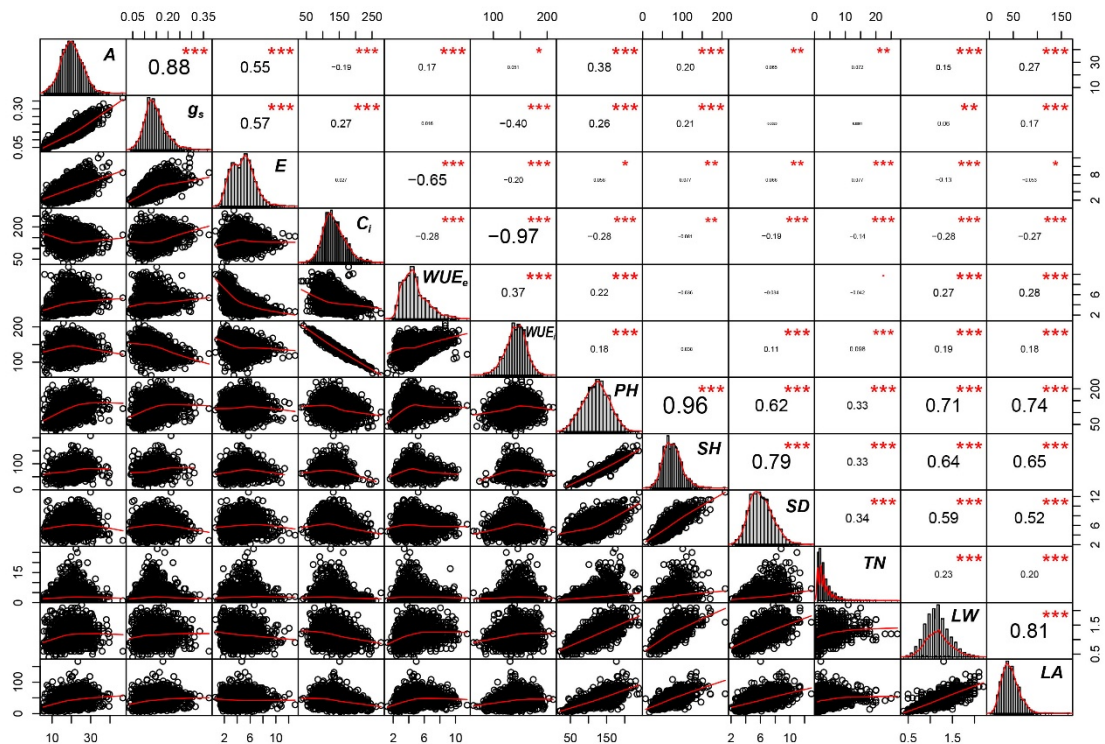

**Supplementary Figure 4.** Correlation analysis between the growth traits and photosynthetic parameters. The histograms in diagonal line show the whole distribution character in growth and photosynthetic parameters of hybrid genotypes during the 2018 and 2019 growing season. The red asterisks show the significant correlation between each two traits. The figures are the coefficient of association between each two traits. The scatter diagrams in bottom left show the pictorial diagram of each two traits. *A*: photosynthetic rate.  $g_s$ : stomatal conductance. *E*: transpiration rate.  $C_i$ : intercellular CO<sub>2</sub> concentration.  $WUE_e$ : extrinsic water use efficiency.  $WUE_i$ : intrinsic water use efficiency. *PH*: plant height. *SH*: stem height. *SD*: stem diameter. *TN*: tiller number. *LW*: leaf width. *LA*: leaf area. \* represents the correlation at  $P < 0.05$  level. \*\* represents the correlation at  $P < 0.01$  level. \*\*\* represents the correlation at  $P < 0.001$  level.

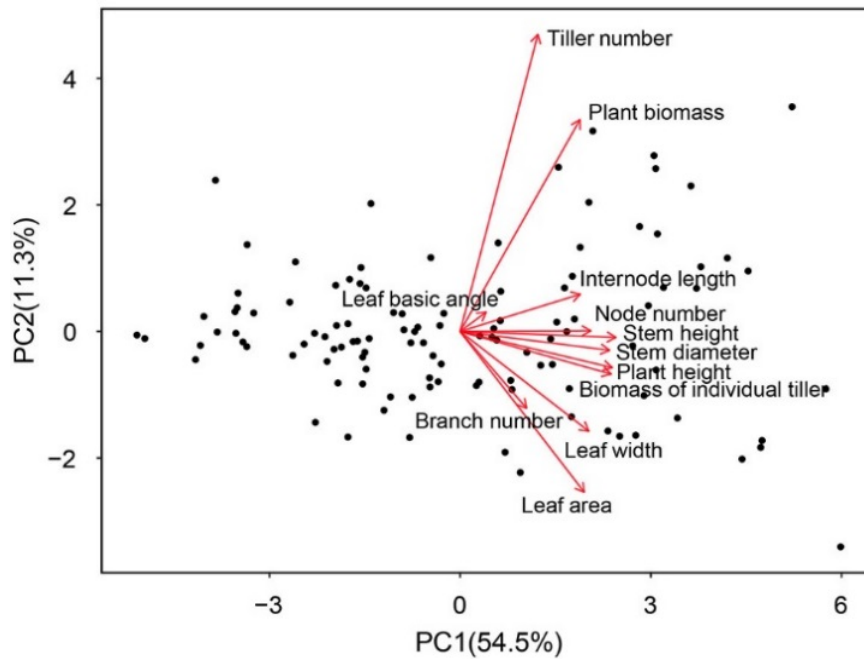

**Supplementary Figure 5.** The principal component analysis in growth traits of hybrid genotype. The black dots represent the hybrid genotypes in the study. The red arrows show the response of growth traits to the principal component.

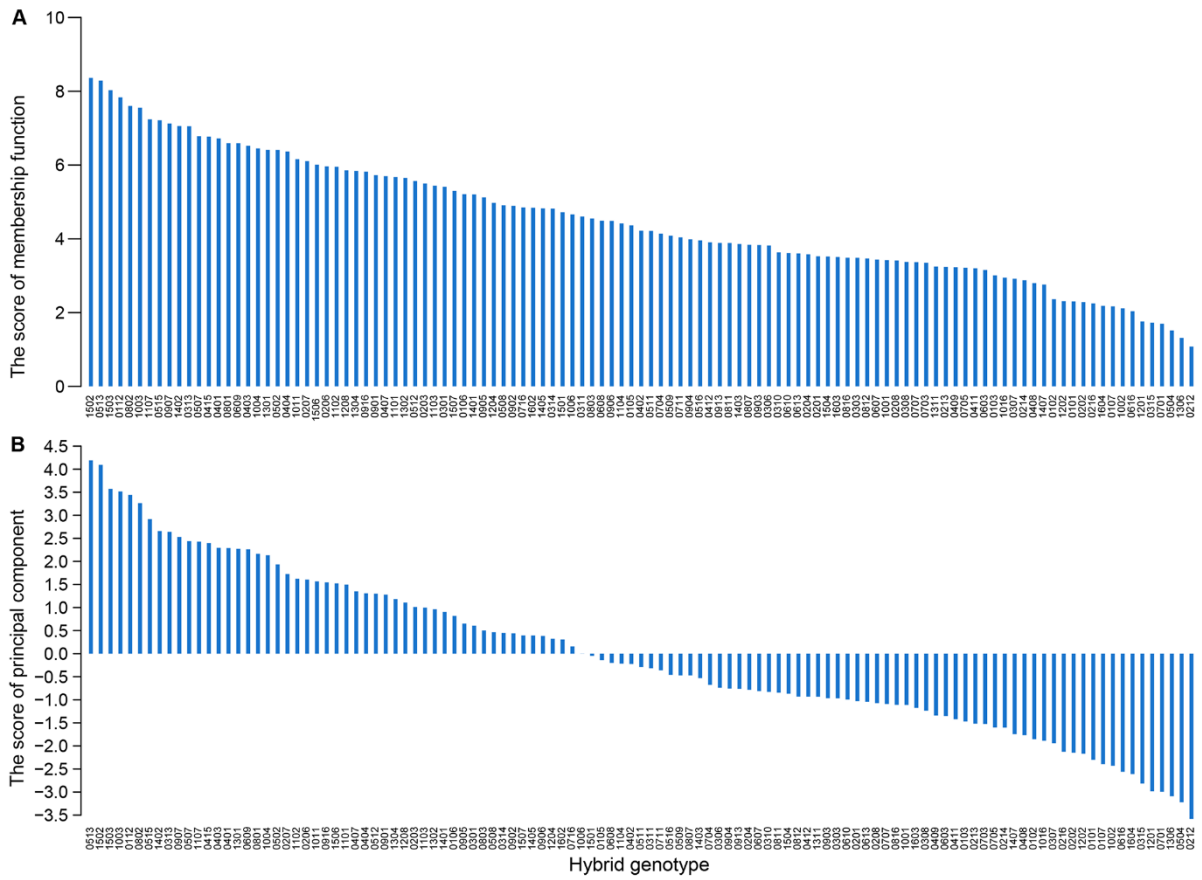

**Supplementary Figure 6.** The integrated score using (A) the membership function, (B) principal component for each hybrid genotype.

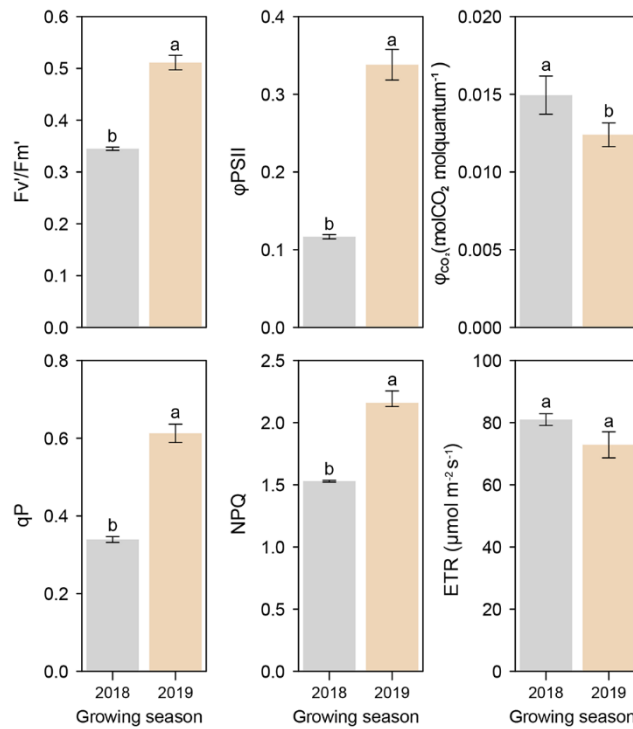

**Supplementary Figure 7.** The fluorescence parameters of hybrid leaf in the most vigorous growth months. The different lowercases represent a significant difference between the growing seasons at  $P < 0.05$  level. Error bars indicate standard error of 333 surviving hybrid individuals in 2018 and 2019, respectively.

## Supplementary tables

**Supplementary Table 1.** The trait variation within hybrid genotypes at the end of the 2018 growing season. A total of 333 individuals of 113 hybrid genotypes are calculated. Min and Max represent the minimum and maximum value in all traits measured, respectively. Mean is the average value to all values of traits measured. *SDEV* is the abbreviation of standard deviation. *CV* represents the variable coefficient. *A*: Photosynthetic rate.  $g_s$ : Stomatal conductance.  $C_i$ : Intercellular CO<sub>2</sub> concentration. *E*: Transpiration rate. WUE<sub>e</sub>: extrinsic water use efficiency ( $A/E$ ). WUE<sub>i</sub>: intrinsic water use efficiency ( $A/g_s$ ).

| Traits                                                          | Min    | Max    | Mean   | <i>SDEV</i> | <i>CV</i> (%) |
|-----------------------------------------------------------------|--------|--------|--------|-------------|---------------|
| Plant height (cm)                                               | 73.33  | 153.00 | 116.55 | 17.92       | 15.38         |
| Stem height (cm)                                                | 26.54  | 92.36  | 62.39  | 13.95       | 22.36         |
| Stem diameter (mm)                                              | 2.60   | 7.89   | 5.59   | 1.04        | 18.61         |
| Tiller number                                                   | 1      | 10     | 2.93   | 1.58        | 54.10         |
| Node number                                                     | 8      | 16     | 12.62  | 1.80        | 14.23         |
| Branch number                                                   | 0      | 8      | 1.68   | 1.51        | 90.17         |
| Internode length (cm)                                           | 3.75   | 11.00  | 6.98   | 1.32        | 18.91         |
| Leaf width (cm)                                                 | 0.73   | 1.63   | 1.23   | 0.19        | 15.74         |
| Leaf area (cm <sup>2</sup> )                                    | 22.63  | 73.51  | 47.12  | 10.91       | 23.16         |
| Leaf base angle (°)                                             | 11.33  | 35.33  | 23.31  | 4.65        | 19.93         |
| Biomass of individual tiller (g)                                | 2.08   | 25.28  | 7.88   | 4.78        | 60.62         |
| Plant biomass (g)                                               | 2.50   | 55.45  | 15.59  | 11.53       | 73.95         |
| <i>A</i> (μmolCO <sub>2</sub> m <sup>-2</sup> s <sup>-1</sup> ) | 10.09  | 25.83  | 18.24  | 3.06        | 16.79         |
| $g_s$ (mmolCO <sub>2</sub> m <sup>-2</sup> s <sup>-1</sup> )    | 0.06   | 0.17   | 0.12   | 0.02        | 18.12         |
| $C_i$ (μmol mol <sup>-1</sup> )                                 | 49.30  | 212.91 | 116.98 | 27.47       | 23.49         |
| <i>E</i> (mmolH <sub>2</sub> Om <sup>-2</sup> s <sup>-1</sup> ) | 0.88   | 4.32   | 2.77   | 0.66        | 23.92         |
| WUE( <i>A/E</i> ) (mmol mol <sup>-1</sup> )                     | 4.99   | 11.27  | 6.82   | 1.28        | 18.77         |
| WUE( <i>A/g<sub>s</sub></i> ) (μmol mol <sup>-1</sup> )         | 101.59 | 201.33 | 157.68 | 16.03       | 10.17         |



**Supplementary Table 2. Total variance in the interpretation.**

| Principal component | Initial Eigenvalues |                        |                            | Extraction Sums of Squared Loadings |                        |                            |
|---------------------|---------------------|------------------------|----------------------------|-------------------------------------|------------------------|----------------------------|
|                     | Total               | Percentage of variance | Percentage of accumulation | Total                               | Percentage of variance | Percentage of accumulation |
| 1                   | 6.54                | 54.51                  | 54.51                      | 6.54                                | 54.51                  | 54.51                      |
| 2                   | 1.36                | 11.34                  | 65.85                      | 1.36                                | 11.34                  | 65.85                      |
| 3                   | 1.00                | 8.37                   | 74.22                      | 1.00                                | 8.37                   | 74.22                      |
| 4                   | 0.97                | 8.09                   | 82.31                      |                                     |                        |                            |
| 5                   | 0.58                | 4.79                   | 87.10                      |                                     |                        |                            |
| 6                   | 0.53                | 4.37                   | 91.48                      |                                     |                        |                            |
| 7                   | 0.28                | 2.32                   | 93.79                      |                                     |                        |                            |
| 8                   | 0.26                | 2.15                   | 95.94                      |                                     |                        |                            |
| 9                   | 0.17                | 1.39                   | 97.33                      |                                     |                        |                            |
| 10                  | 0.16                | 1.35                   | 98.68                      |                                     |                        |                            |
| 11                  | 0.10                | 0.86                   | 99.54                      |                                     |                        |                            |
| 12                  | 0.06                | 0.46                   | 100.00                     |                                     |                        |                            |

**Supplementary Table 3.** Loading matrix of principal component.

| Traits                           | Comp.1 | Comp.2 | Comp.3 |
|----------------------------------|--------|--------|--------|
| Biomass of individual tiller (g) | 0.907  | -0.117 | -0.065 |
| Plant biomass (g)                | 0.720  | 0.582  | -0.087 |
| Tiller number                    | 0.467  | 0.817  | -0.094 |
| Stem diameter (cm)               | 0.897  | -0.052 | -0.050 |
| Leaf width (cm)                  | 0.772  | -0.274 | -0.068 |
| Node number                      | 0.785  | 0.002  | 0.114  |
| Leaf area (cm <sup>2</sup> )     | 0.745  | -0.442 | 0.002  |
| Branch number (cm)               | 0.399  | -0.211 | -0.272 |
| Internode length (cm)            | 0.721  | 0.102  | 0.018  |
| Leaf basic angle (°)             | 0.156  | 0.053  | 0.937  |
| Plant height (cm)                | 0.913  | -0.099 | 0.098  |
| Stem height (cm)                 | 0.935  | -0.016 | 0.032  |

**Supplementary Table 4.** The score coefficient matrix of principal component.

| Traits                           | Comp.1 | Comp.2 | Comp.3 |
|----------------------------------|--------|--------|--------|
| Biomass of individual tiller (g) | 0.354  | -0.100 | -0.065 |
| Plant biomass (g)                | 0.281  | 0.499  | -0.087 |
| Tiller number                    | 0.183  | 0.700  | -0.093 |
| Stem diameter (cm)               | 0.351  | -0.040 | -0.050 |
| Leaf width (cm)                  | 0.302  | -0.235 | -0.068 |
| Node number                      | 0.307  | 0.002  | 0.114  |
| Leaf area (cm <sup>2</sup> )     | 0.291  | -0.379 | 0.002  |
| Branch number (cm)               | 0.156  | -0.181 | -0.272 |
| Internode length (cm)            | 0.282  | 0.088  | 0.018  |
| Leaf basic angle (°)             | 0.061  | 0.046  | 0.935  |
| Plant height (cm)                | 0.357  | -0.085 | 0.098  |
| Stem height (cm)                 | 0.365  | -0.014 | 0.032  |

**Supplementary Table 5.** The integrate score of each principal component.

| Genotypes | Comp.1 | Comp.2 | Comp.3 | Genotypes | Comp.1 | Comp.2 | Comp.3 |
|-----------|--------|--------|--------|-----------|--------|--------|--------|
| 0513      | 6.107  | -0.572 | -1.835 | 0314      | 0.745  | -0.166 | -0.658 |
| 1502      | 6.123  | -3.470 | 1.131  | 0902      | 0.450  | 0.151  | 0.769  |
| 1503      | 4.437  | 3.530  | -1.986 | 1507      | 0.752  | 0.131  | -1.569 |
| 1003      | 4.451  | 0.995  | 0.830  | 1405      | 0.523  | 0.002  | 0.089  |
| 0112      | 5.161  | -1.632 | -0.891 | 0906      | 0.033  | -0.020 | 3.212  |
| 0802      | 4.427  | 0.925  | -1.146 | 1204      | 0.539  | -0.937 | 0.624  |
| 0515      | 3.658  | 1.133  | 0.511  | 1602      | 0.496  | 0.021  | -0.534 |
| 1402      | 3.135  | 2.285  | 0.050  | 0716      | 0.736  | -1.837 | -0.911 |
| 0313      | 3.325  | 0.648  | 0.900  | 1006      | 0.216  | -0.826 | -0.265 |
| 0907      | 3.752  | -2.058 | 0.792  | 1501      | 0.273  | -0.804 | -1.122 |
| 0507      | 2.973  | 1.503  | 0.233  | 0105      | -0.169 | -0.541 | 0.605  |
| 1107      | 3.699  | -1.761 | -0.162 | 0608      | 0.042  | -0.877 | -0.861 |
| 0415      | 2.688  | 2.769  | 0.010  | 1104      | -0.603 | 1.167  | 0.423  |
| 0403      | 2.851  | 1.623  | -0.425 | 0402      | -0.386 | -0.204 | 0.807  |
| 0401      | 2.618  | 2.556  | -0.200 | 0511      | -0.357 | -0.894 | 0.956  |
| 1301      | 2.303  | 2.031  | 2.408  | 0311      | -0.041 | -1.935 | 0.084  |
| 0609      | 2.946  | 0.662  | -0.024 | 0711      | -0.589 | 0.009  | 0.623  |
| 0801      | 3.032  | -0.647 | 0.324  | 0516      | -0.677 | 0.347  | -0.129 |
| 1004      | 2.728  | 0.392  | 0.620  | 0509      | -0.587 | 0.070  | -0.448 |
| 0502      | 2.823  | -1.043 | 0.189  | 0807      | -0.564 | -1.058 | 0.927  |
| 0207      | 1.789  | 3.153  | -0.615 | 1403      | -1.190 | 2.013  | 0.335  |
| 1102      | 1.836  | 0.861  | 1.265  | 0704      | -0.494 | -0.190 | -2.524 |
| 0206      | 2.514  | -1.684 | 0.167  | 0306      | -0.399 | -1.707 | -1.629 |
| 1011      | 2.394  | -0.263 | -1.342 | 0904      | -0.865 | 0.266  | -1.452 |
| 0916      | 1.802  | 1.300  | 0.217  | 0913      | -0.931 | -1.054 | 0.719  |
| 1506      | 1.859  | 0.175  | 1.165  | 0204      | -1.145 | -0.128 | 0.690  |
| 1101      | 1.568  | 2.569  | -0.410 | 0607      | -1.128 | -0.185 | 0.402  |
| 0407      | 2.031  | -1.381 | 0.624  | 0310      | -1.153 | -0.606 | 0.974  |
| 0404      | 2.236  | -1.397 | -1.072 | 0811      | -0.888 | -0.403 | -1.158 |
| 0512      | 1.662  | -0.550 | 1.449  | 1504      | -1.243 | 0.086  | 0.282  |
| 0901      | 1.516  | 0.668  | 0.558  | 0812      | -1.367 | 0.097  | 0.502  |
| 1304      | 2.023  | -1.600 | -0.507 | 0412      | -0.963 | -0.816 | -0.905 |
| 1208      | 1.830  | -1.688 | 0.206  | 1311      | -1.297 | -1.068 | 1.596  |
| 0203      | 1.476  | -0.927 | 0.621  | 0903      | -0.961 | -0.759 | -1.284 |
| 1103      | 1.601  | -0.547 | -0.833 | 0303      | -1.340 | -0.131 | 0.312  |
| 1302      | 1.296  | -0.034 | 0.155  | 0610      | -1.204 | 0.283  | -1.350 |
| 1401      | 0.764  | -0.105 | 3.189  | 0201      | -1.731 | 0.822  | 1.052  |
| 0106      | 0.870  | 0.617  | 0.762  | 0613      | -1.669 | 0.675  | 0.690  |
| 0905      | 0.879  | -0.352 | 0.537  | 0208      | -1.640 | -0.257 | 1.513  |
| 0301      | 1.097  | -0.134 | -1.576 | 0707      | -1.706 | 0.721  | 0.463  |
| 0803      | 0.495  | -0.092 | 1.373  | 0816      | -1.618 | 0.995  | -0.654 |
| 0508      | 0.453  | 1.379  | -0.683 | 1001      | -1.525 | -0.166 | 0.298  |
| 1603      | -1.782 | 0.753  | 0.165  | 0202      | -2.949 | -0.250 | 0.489  |
| 0308      | -1.490 | -0.795 | -0.166 | 1202      | -3.071 | 0.603  | -0.045 |
| 0409      | -1.862 | -0.301 | 0.645  | 0101      | -3.160 | 0.290  | -0.213 |
| 0603      | -1.996 | -0.043 | 1.067  | 0107      | -3.203 | -0.173 | -0.158 |
| 0411      | -1.851 | -0.831 | 0.593  | 1002      | -3.359 | 0.358  | -0.177 |
| 0103      | -2.239 | 1.091  | 0.063  | 0616      | -3.414 | 0.302  | -0.877 |
| 0213      | -1.849 | -0.082 | -1.292 | 1604      | -3.547 | 1.373  | -1.912 |

**Continued Supplementary Table 5.**

| Genotypes | Comp.1 | Comp.2 | Comp.3 | Genotypes | Comp.1 | Comp.2 | Comp.3 |
|-----------|--------|--------|--------|-----------|--------|--------|--------|
| 0703      | -1.694 | -1.265 | -0.760 | 0315      | -3.725 | -0.229 | -0.405 |
| 0705      | -1.880 | -0.419 | -1.372 | 1201      | -3.868 | -0.015 | -1.237 |
| 0214      | -2.356 | 0.448  | 0.522  | 0701      | -4.032 | 0.237  | -0.630 |
| 1407      | -2.297 | -0.393 | 0.032  | 1306      | -4.177 | -0.335 | 0.260  |
| 0408      | -2.394 | -0.216 | 0.223  | 0504      | -4.095 | -0.452 | -1.290 |
| 0102      | -3.044 | 2.381  | 0.155  | 0212      | -4.794 | -0.119 | -0.385 |
| 1016      | -2.397 | -0.499 | -0.453 |           |        |        |        |
